# Supplementary material for: ER O-glycosylation in synovial fibroblasts drives cartilage degradation
Source: Springer Nature journal article supplement (doi:10.1038/s41467-025-57401-9), 2025-03-14
Supplement: MOESM1 [file 41467_2025_57401_MOESM1_ESM.pdf]

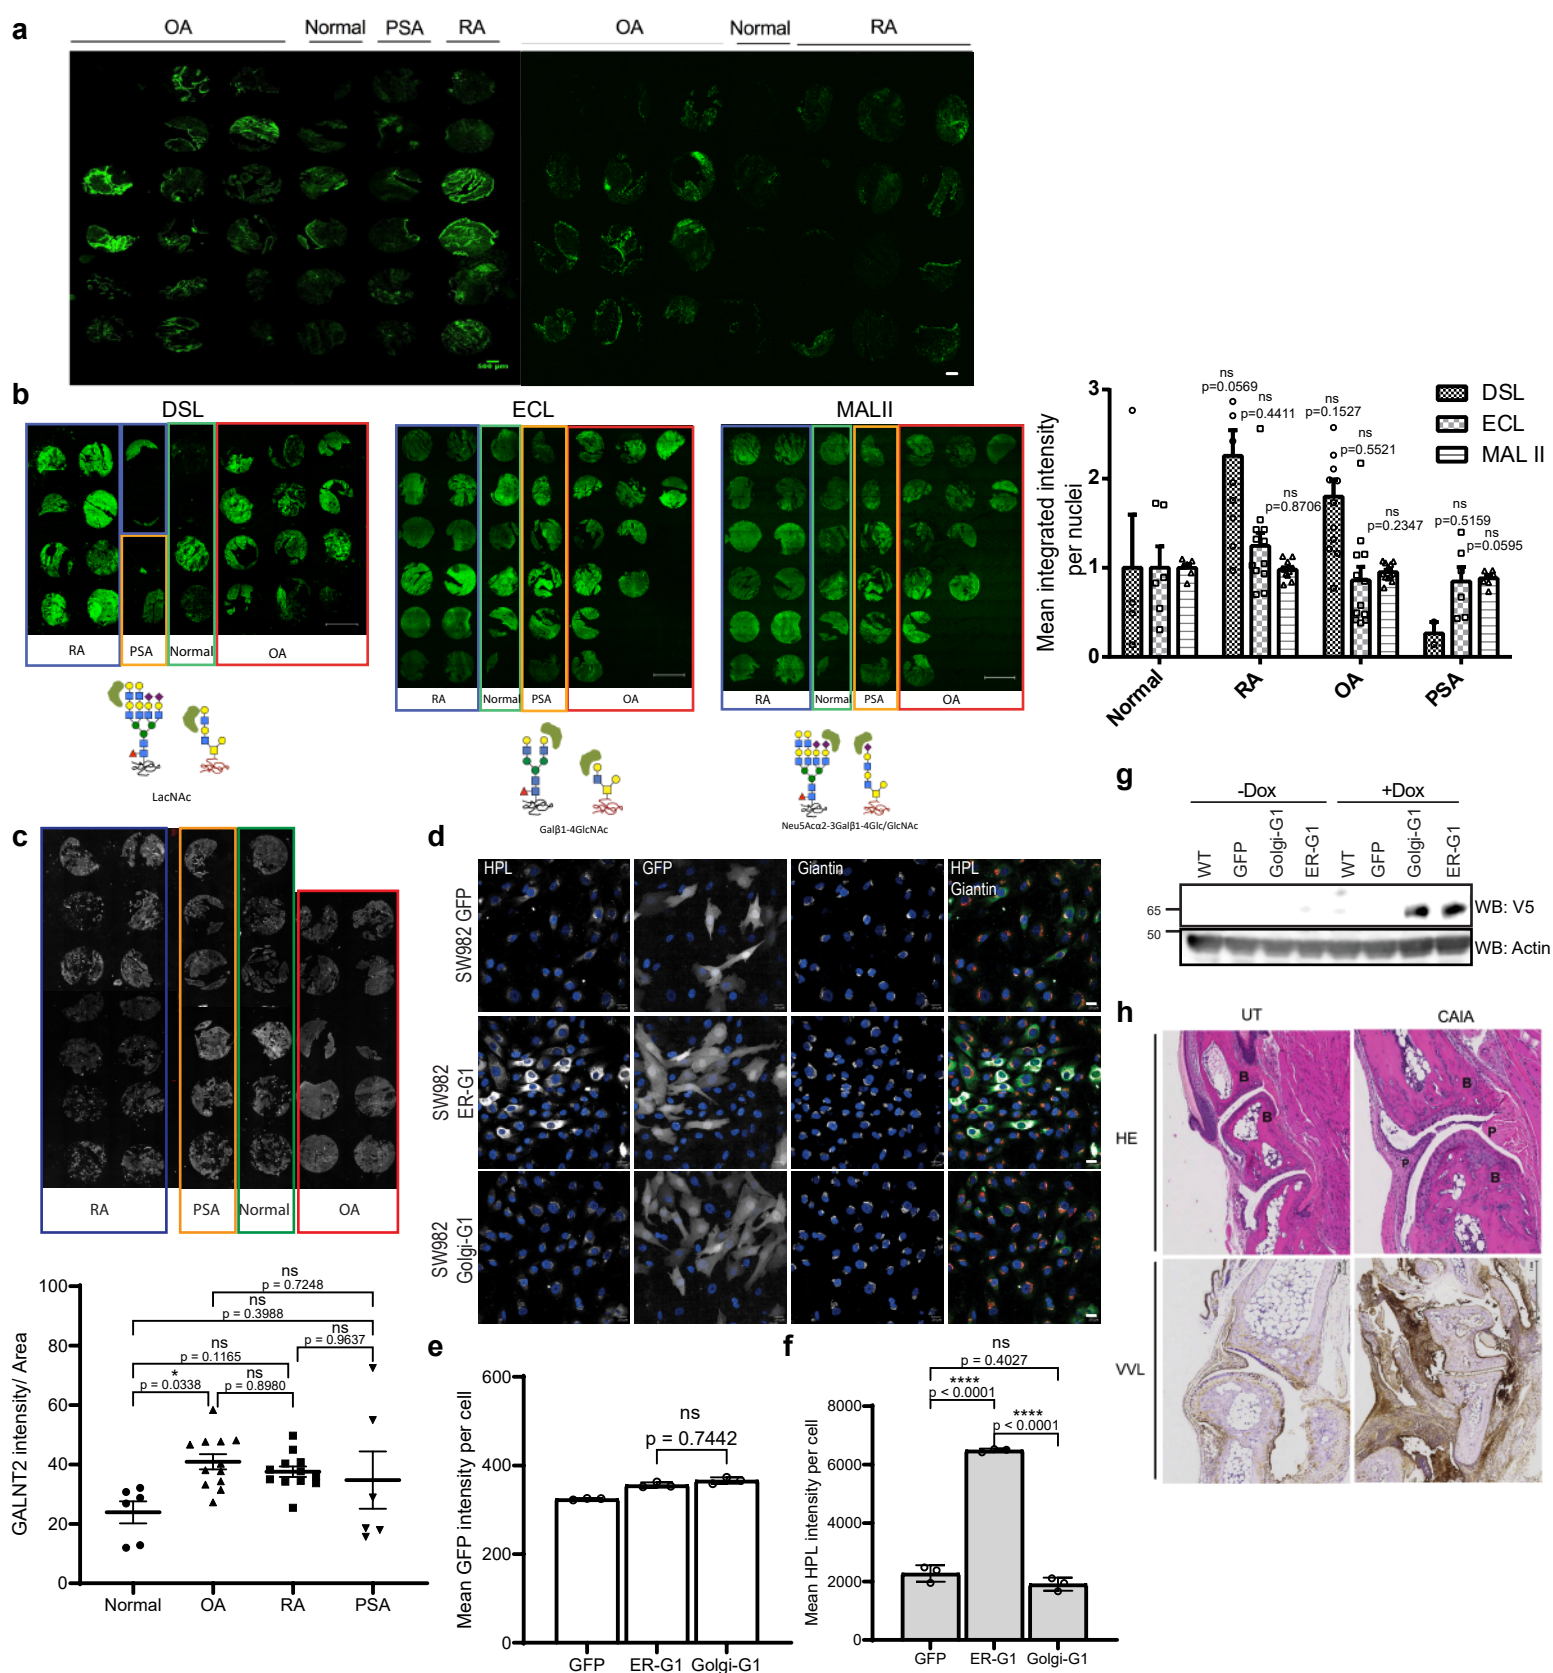

Supplementary Fig. 1: O-GalNAc (Tn) glycans tissue analysis in synovial tissues from both arthritis patients and arthritis induced animals. (a) Representative immunofluorescence (IF) staining of O-GalNAc glycans with VVL lectin on human tissue microarray (TMA) sections from Osteoarthritis (OA), psoriasis (PSA), rheumatoid arthritis (RA) and health subjects (Normal). Magnification 10X. Scale bar, 500  $\mu$ m. (b) IF staining of human tissue array with lectins DSL (Datura Stramonium Lectin), ECL (Erythrina Cristagalli Lectin) and MAL II (Maackia Amurensis Lectin). Glycan structures targeted by the lectins were shown below each panel. Quantification of the lectin staining intensities shown on the right. Data are shown as mean  $\pm$  SD. The p-values presented are statistical tests comparing RA, OA or PSA with respect to normal tissues for each lectin stain. ns, not significant (Two sided Student's t test, two-tailed p-value). (c) IF staining of human tissue array with GALNT2 antibody. Quantification of the staining intensities shown below. \*,  $p < 0.05$  ( $p = 0.0338$ ; Normal vs OA); ns, not significant (One-way ANOVA test). (d) Representative images of Tn staining using HPL in SW982 cell lines expressing control GFP, ER-localised GALNT1 (ER-G1) and wildtype GALNT1 (Golgi-G1). Scale bar, 20  $\mu$ m. (e) Quantification of total GFP fluorescence intensity in control GFP, ER-G1-GFP and Golgi-G1-GFP expressing SW982 cells. ns, not significant ( $p = 0.7442$ ; ER-G1 vs Golgi-G1) (One-way ANOVA test). (f) Quantification of HPL intensity in GFP, ER-G1 and Golgi-G1 expressing SW982 cells. Data are shown as mean  $\pm$  SD. \*\*\*\*,  $p < 0.0001$ ; ns, not significant ( $p = 0.4027$ ; GFP vs Golgi-G1) (One-way ANOVA test). (g) Levels of exogenously expressed GALNT1 in wildtype SW982 (WT), control GFP (GFP), wildtype GALNT1 (Golgi-G1) and ER-localised GALNT1 (ER-G1) that were uninduced (-Dox) or induced with 1  $\mu$ g/ml doxycycline (+Dox) over 24 hours. Exogenously expressed GALNT1 has a V5 tag. (h) HE histology (upper panel) and immunohistochemistry staining with VVL lectin (lower panel) on collagen type II antibody induced arthritis (CAIA) mice at day 7 or those left untreated (UT).

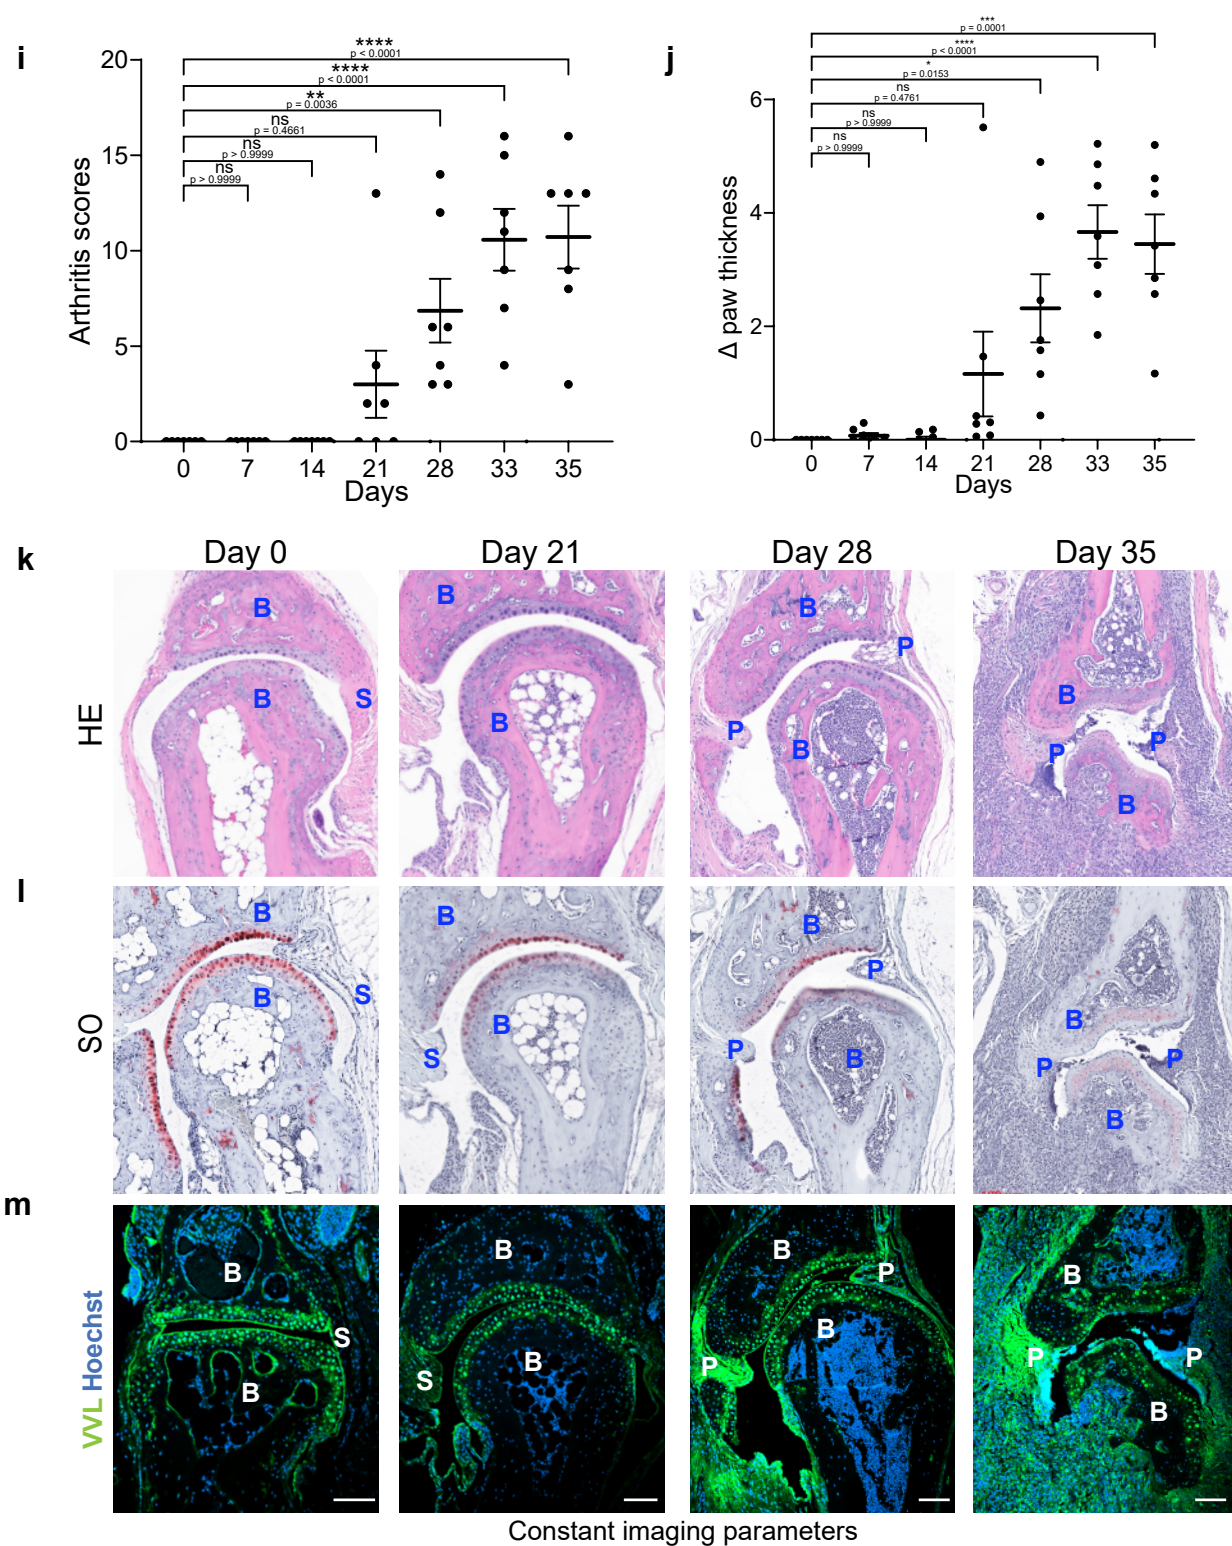

Supplementary Fig. 1: O-GalNAc (Tn) glycans tissue analysis in synovial tissues from both arthritis patients and arthritis induced animals

(i) Clinical scores of CIA mice (n=7) from day 0 to day 35. Mean  $\pm$  SD of the arthritic scores of mice per time point presented. \*\*, p<0.01 (p=0.0036; day 28); \*\*\*\*, p<0.0001 (day 33 and 35); ns, not significant (p>0.9999; day 7 and 14 and p=0.46661; day 21) (Two sided Student's t test, two-tailed p-value).

(j) Measurement of the change in paw thickness in CIA mice from day 0 to day 35. Mean  $\pm$  SD of 7 mice per time point presented. \*, p<0.05 (p=0.0153; day 28); \*\*\*\*, p<0.0001 (day 33 and 35); ns, not significant (p>0.9999; day 7 and 14 and p=0.4761; day 21) (Two sided Student's t test, two-tailed p-value).

(k) Hematoxylin and eosin (HE) histology images of synovial tissues sections from control (day 0) or CIA mice at day 21, 28 and 35. S: synovium; B: bone, P: pannus. (l) Safranin O (SO) histology images of synovial tissues sections from control (day 0) or CIA mice at day 21, 28 and 35. (m) VVL lectin (green) and nuclei (Hoescht) images of synovial tissues sections from control (day 0) or CIA mice at day 21, 28 and 35. Images were acquired under constant parameters. Scale bar, 100  $\mu$ m. Notice strongly VVL stained pannus (P) at day 28 and 35.



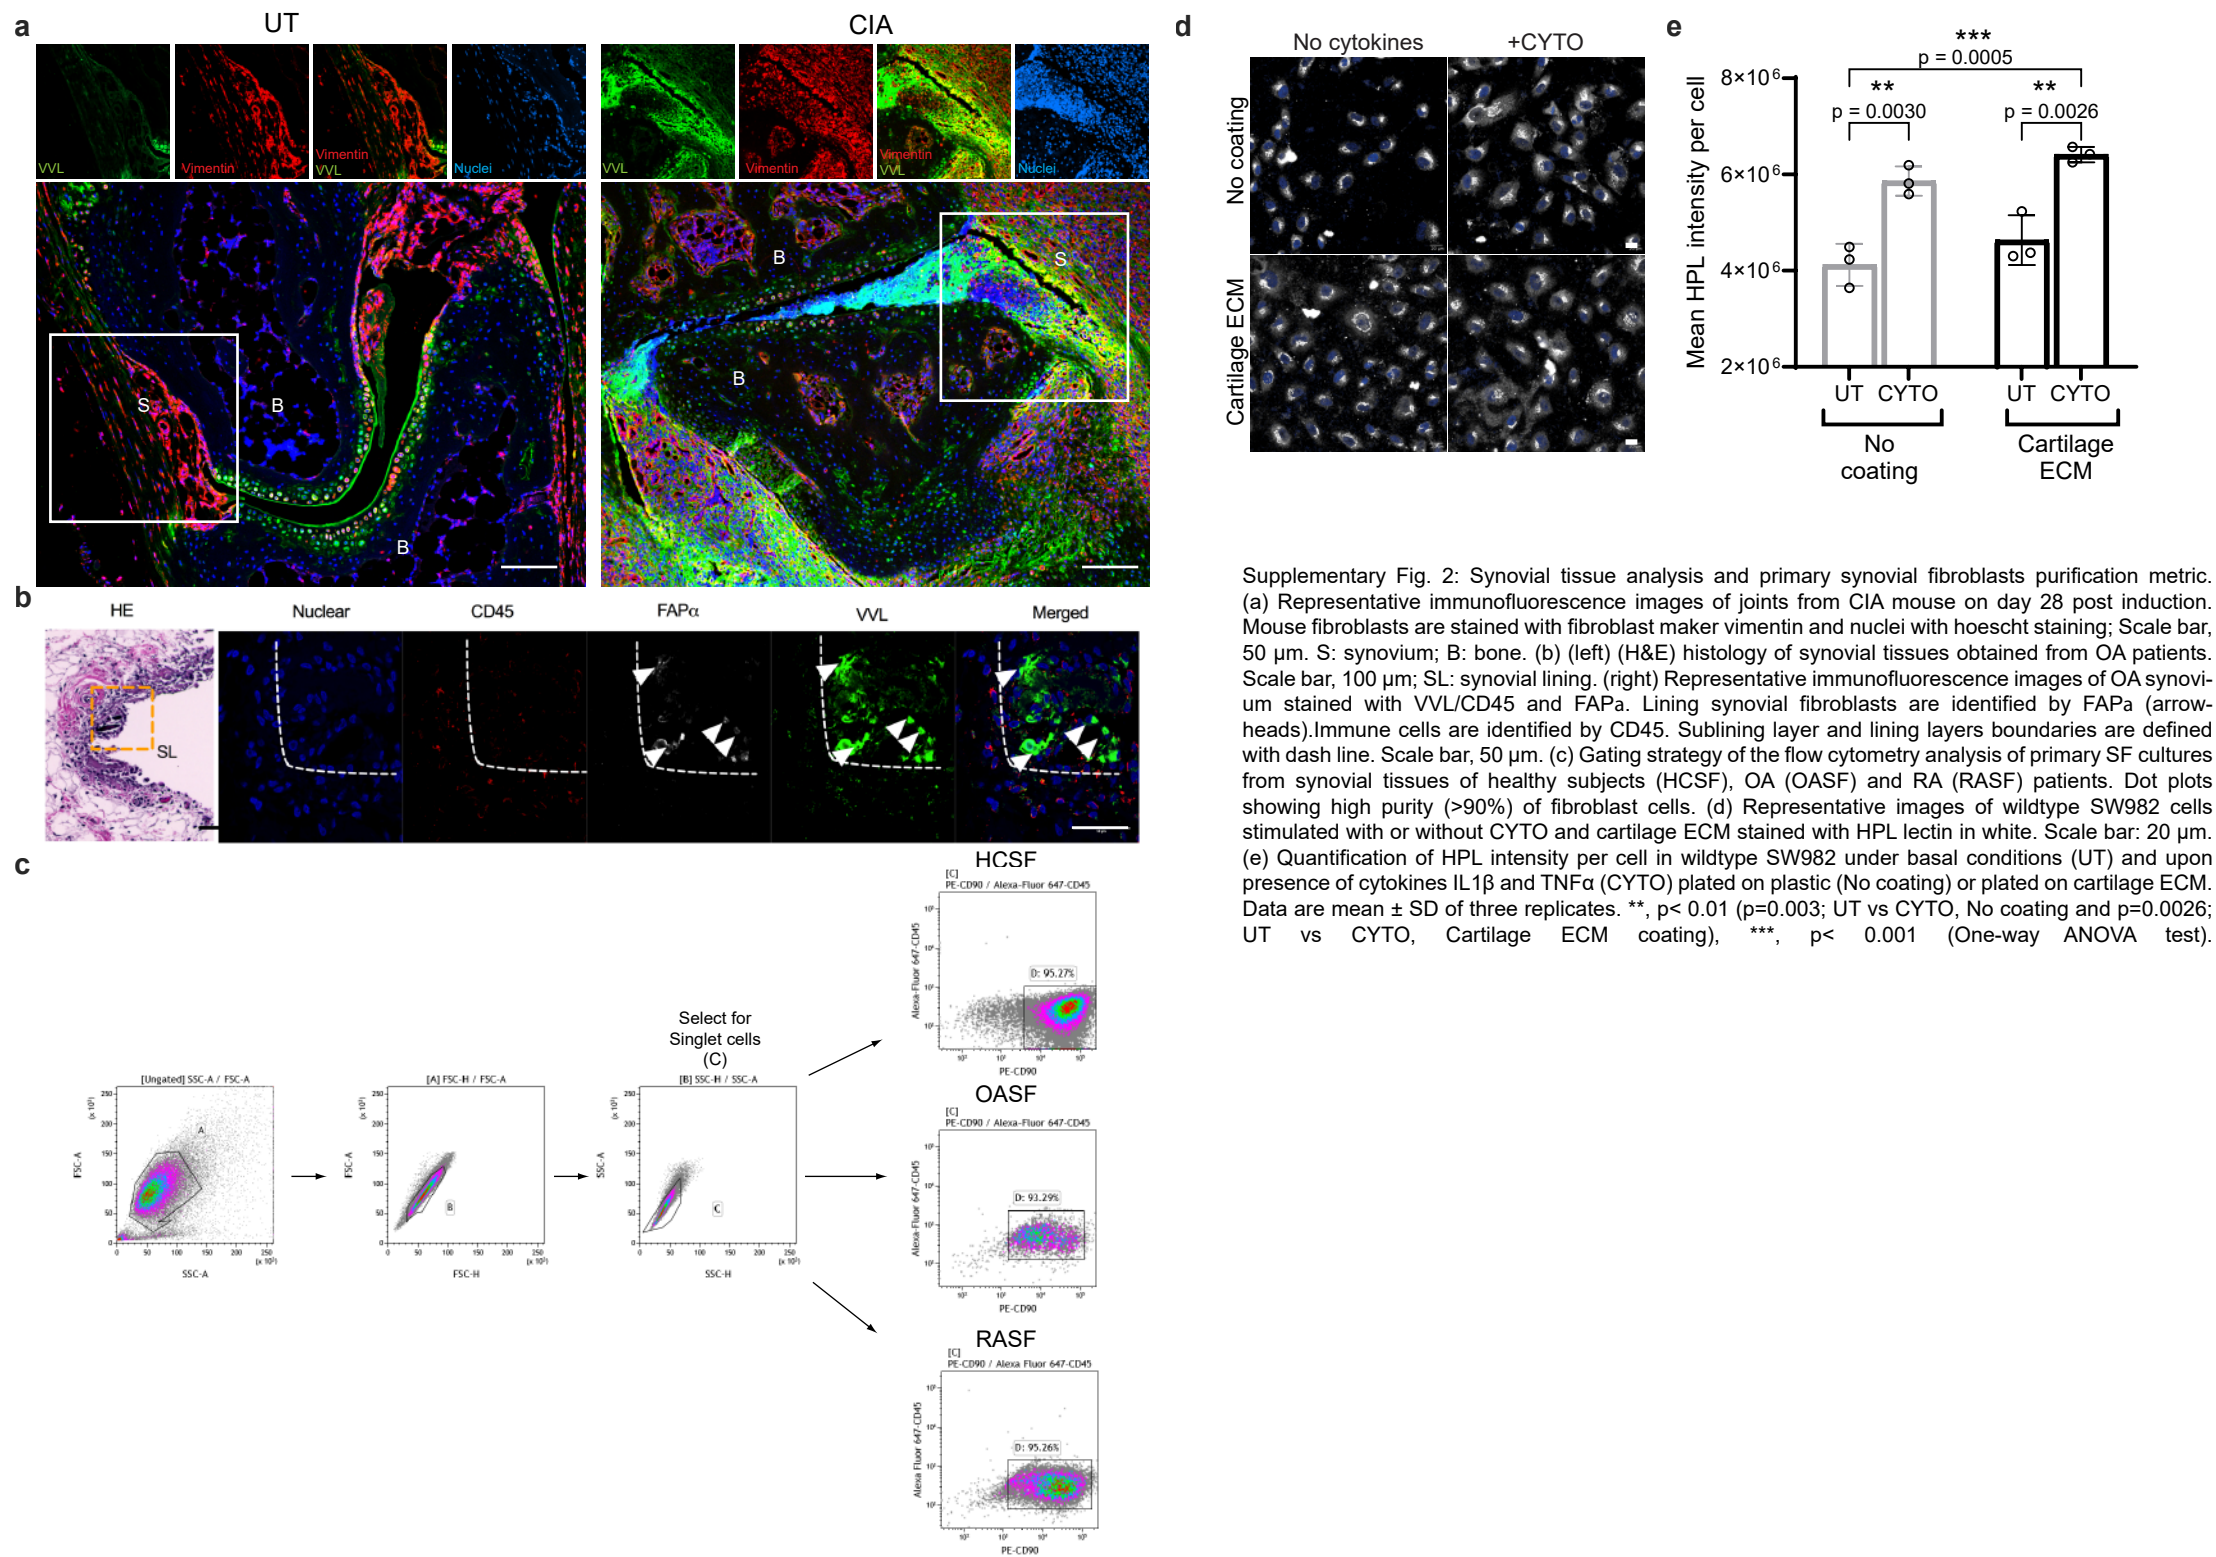

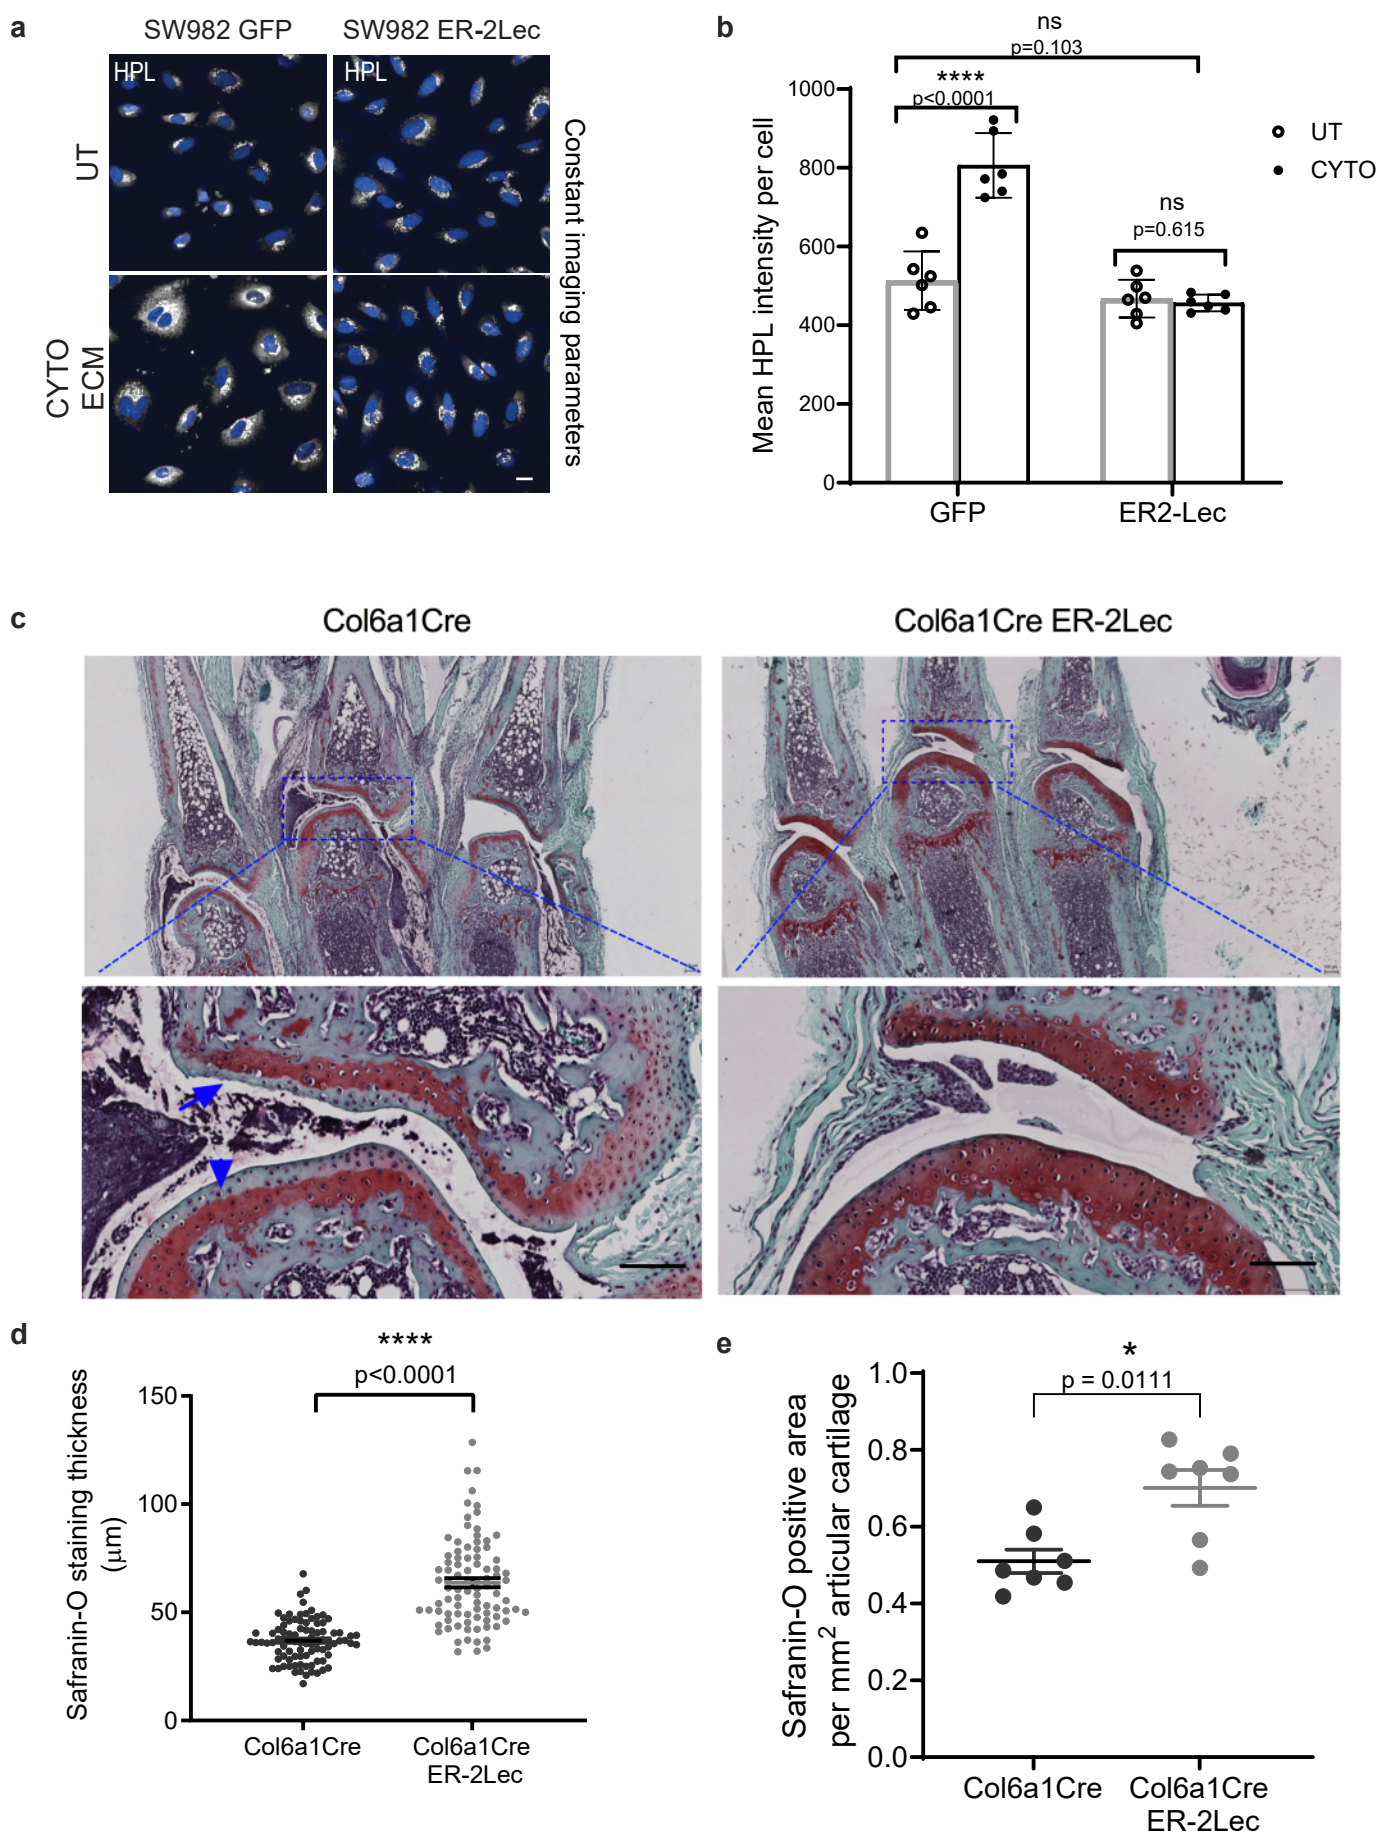

Supplementary Fig. 3: GALA activation causes damage to cartilage in CAIA mice. (a) Tn staining in SW982 cells expressing GFP or ER-2Lec. Scale bar, 20  $\mu\text{m}$ . (b) Quantification of Tn levels in (a). Data are the mean  $\pm$  SEM from 3 replicate wells from each of two independent experiments. \*\*\*,  $p<0.001$ ; ns, not significant (Two sided Student's t test, two-tailed p-value). (c) Representative images of Safranin-O (SO) staining in untreated Col6a1Cre mice or arthritis induced Col6a1Cre and Col6a1Cre ER-2Lec mice at day 7. Scale bars, 100  $\mu\text{m}$ . (d & e) Quantification of SO staining thickness (d) and total positive staining area (e). Arthritis induced cartilage matrix degradation is indicated with arrowheads. Each data point represents an average of positive staining area per  $\text{mm}^2$  articular cartilage from different metacarpophalangeal joints of five animals. Data are shown as mean  $\pm$  SEM. \*,  $p<0.05$  ( $p=0.0111$ ); \*\*\*\*,  $p<0.0001$  (Mann-Whitney test, two-tailed p-value).



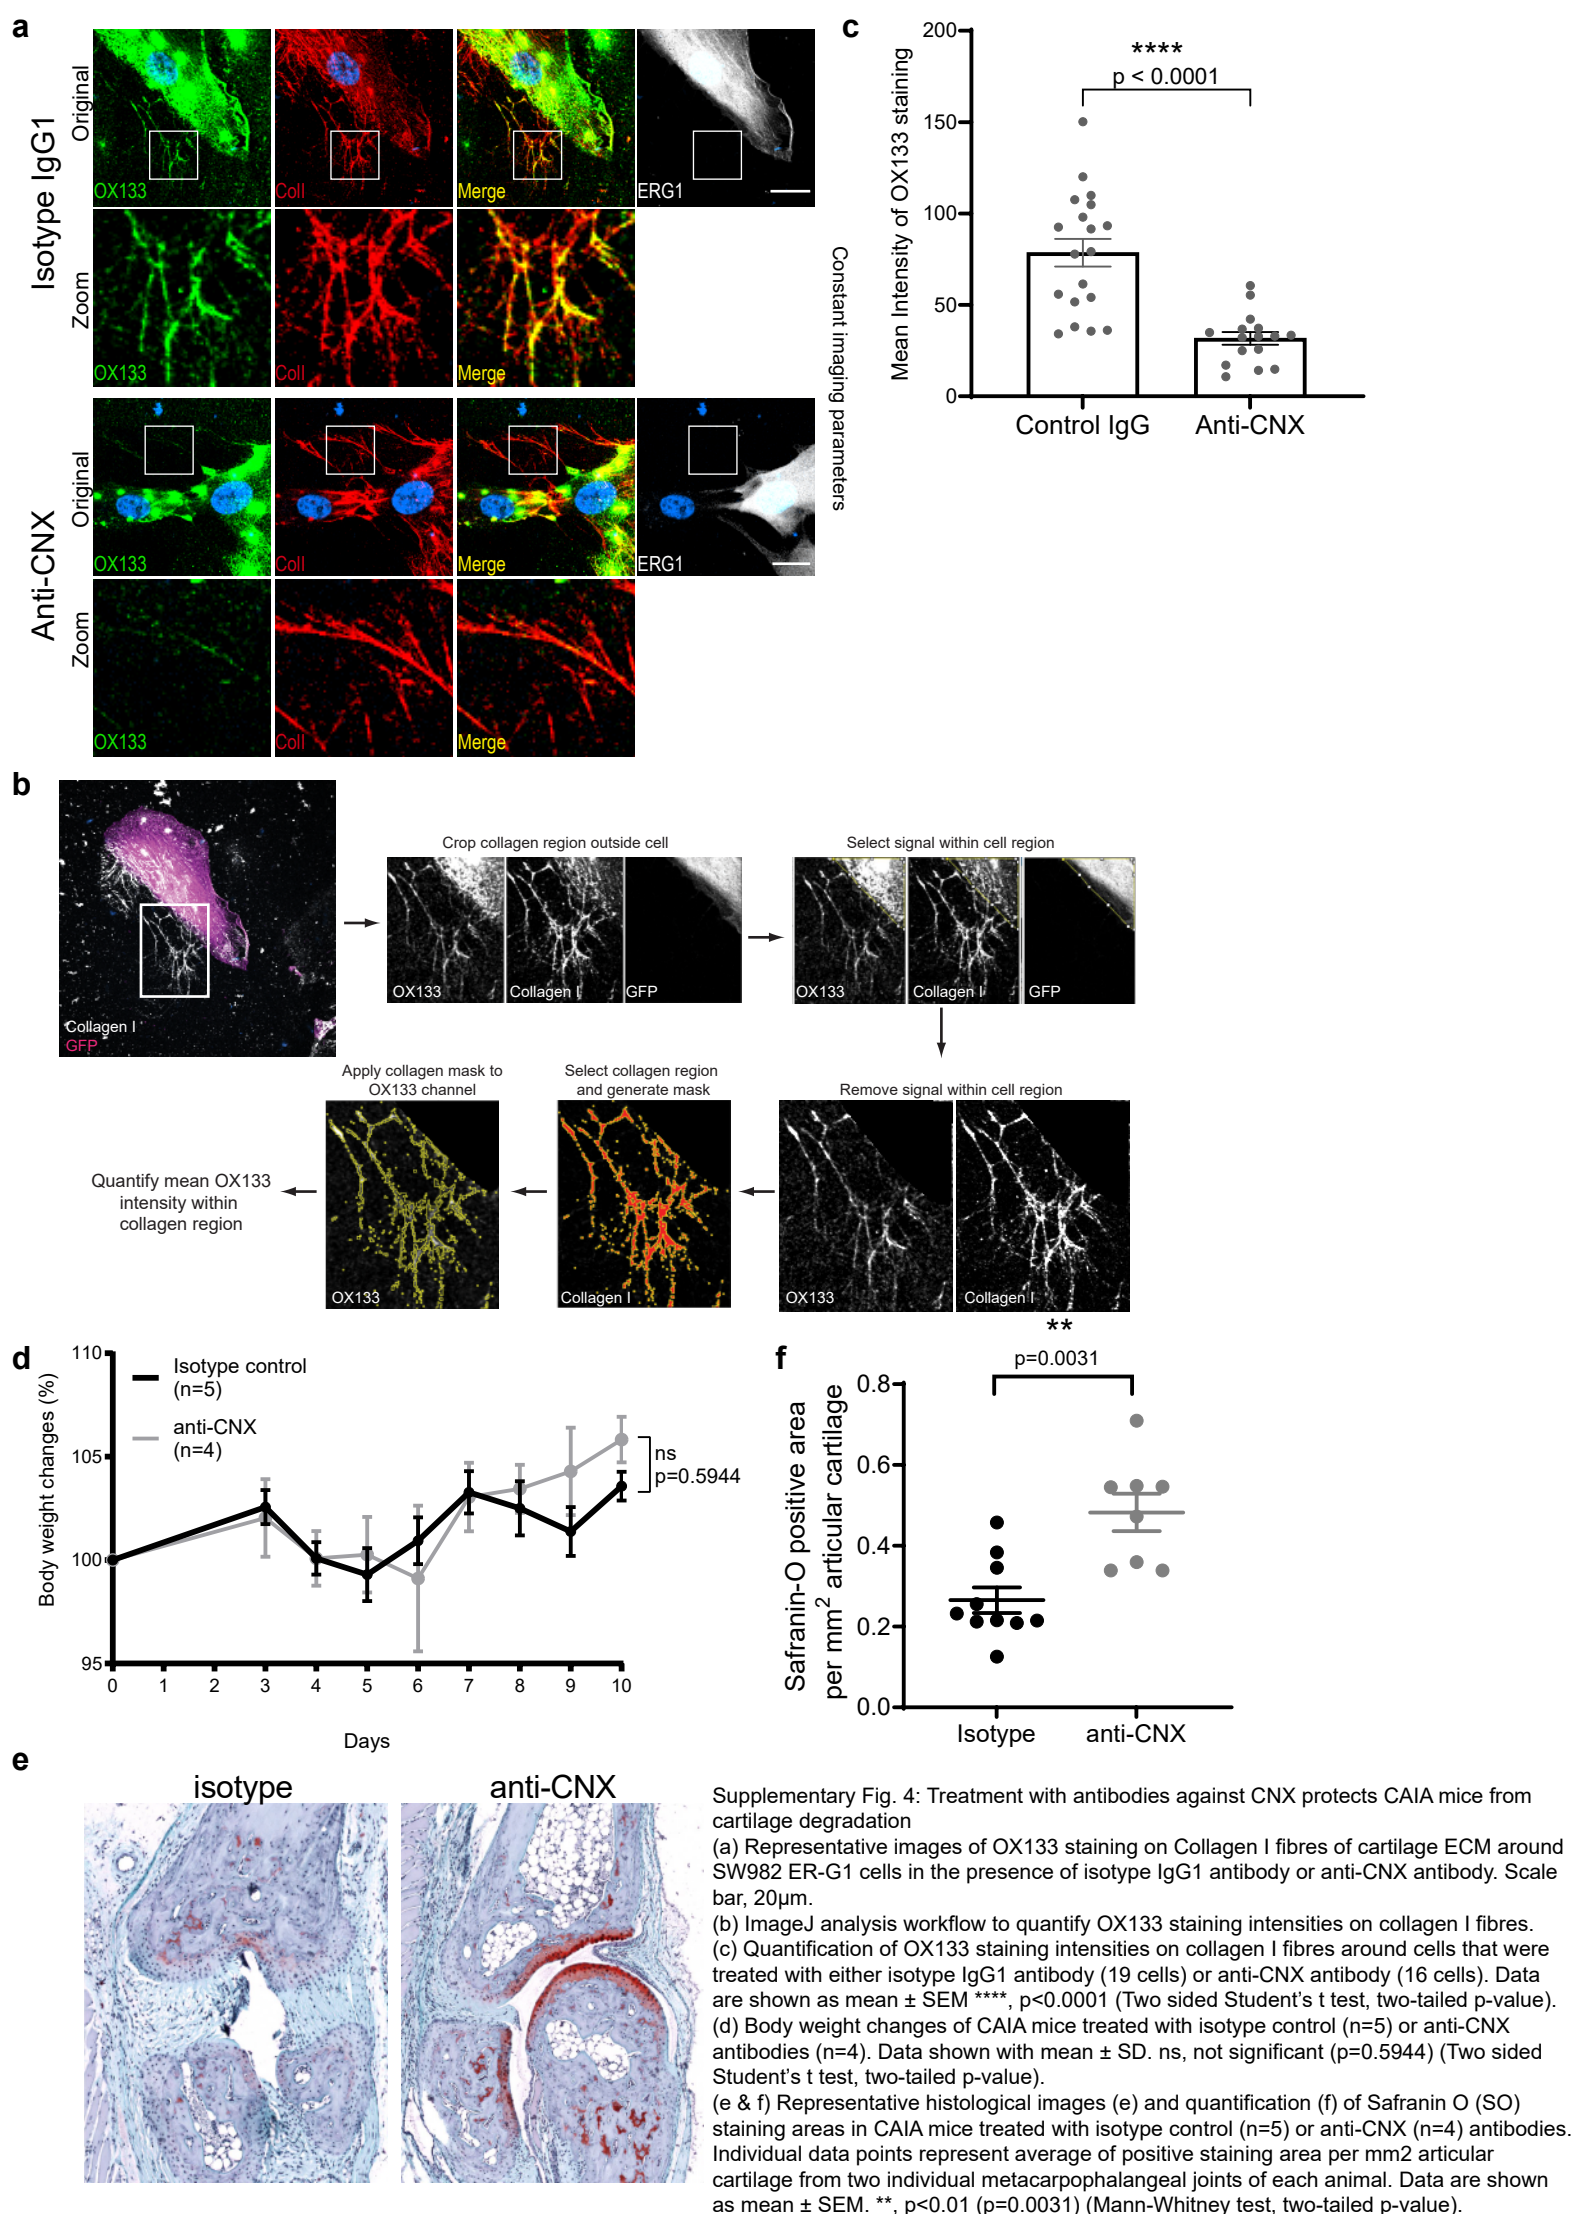

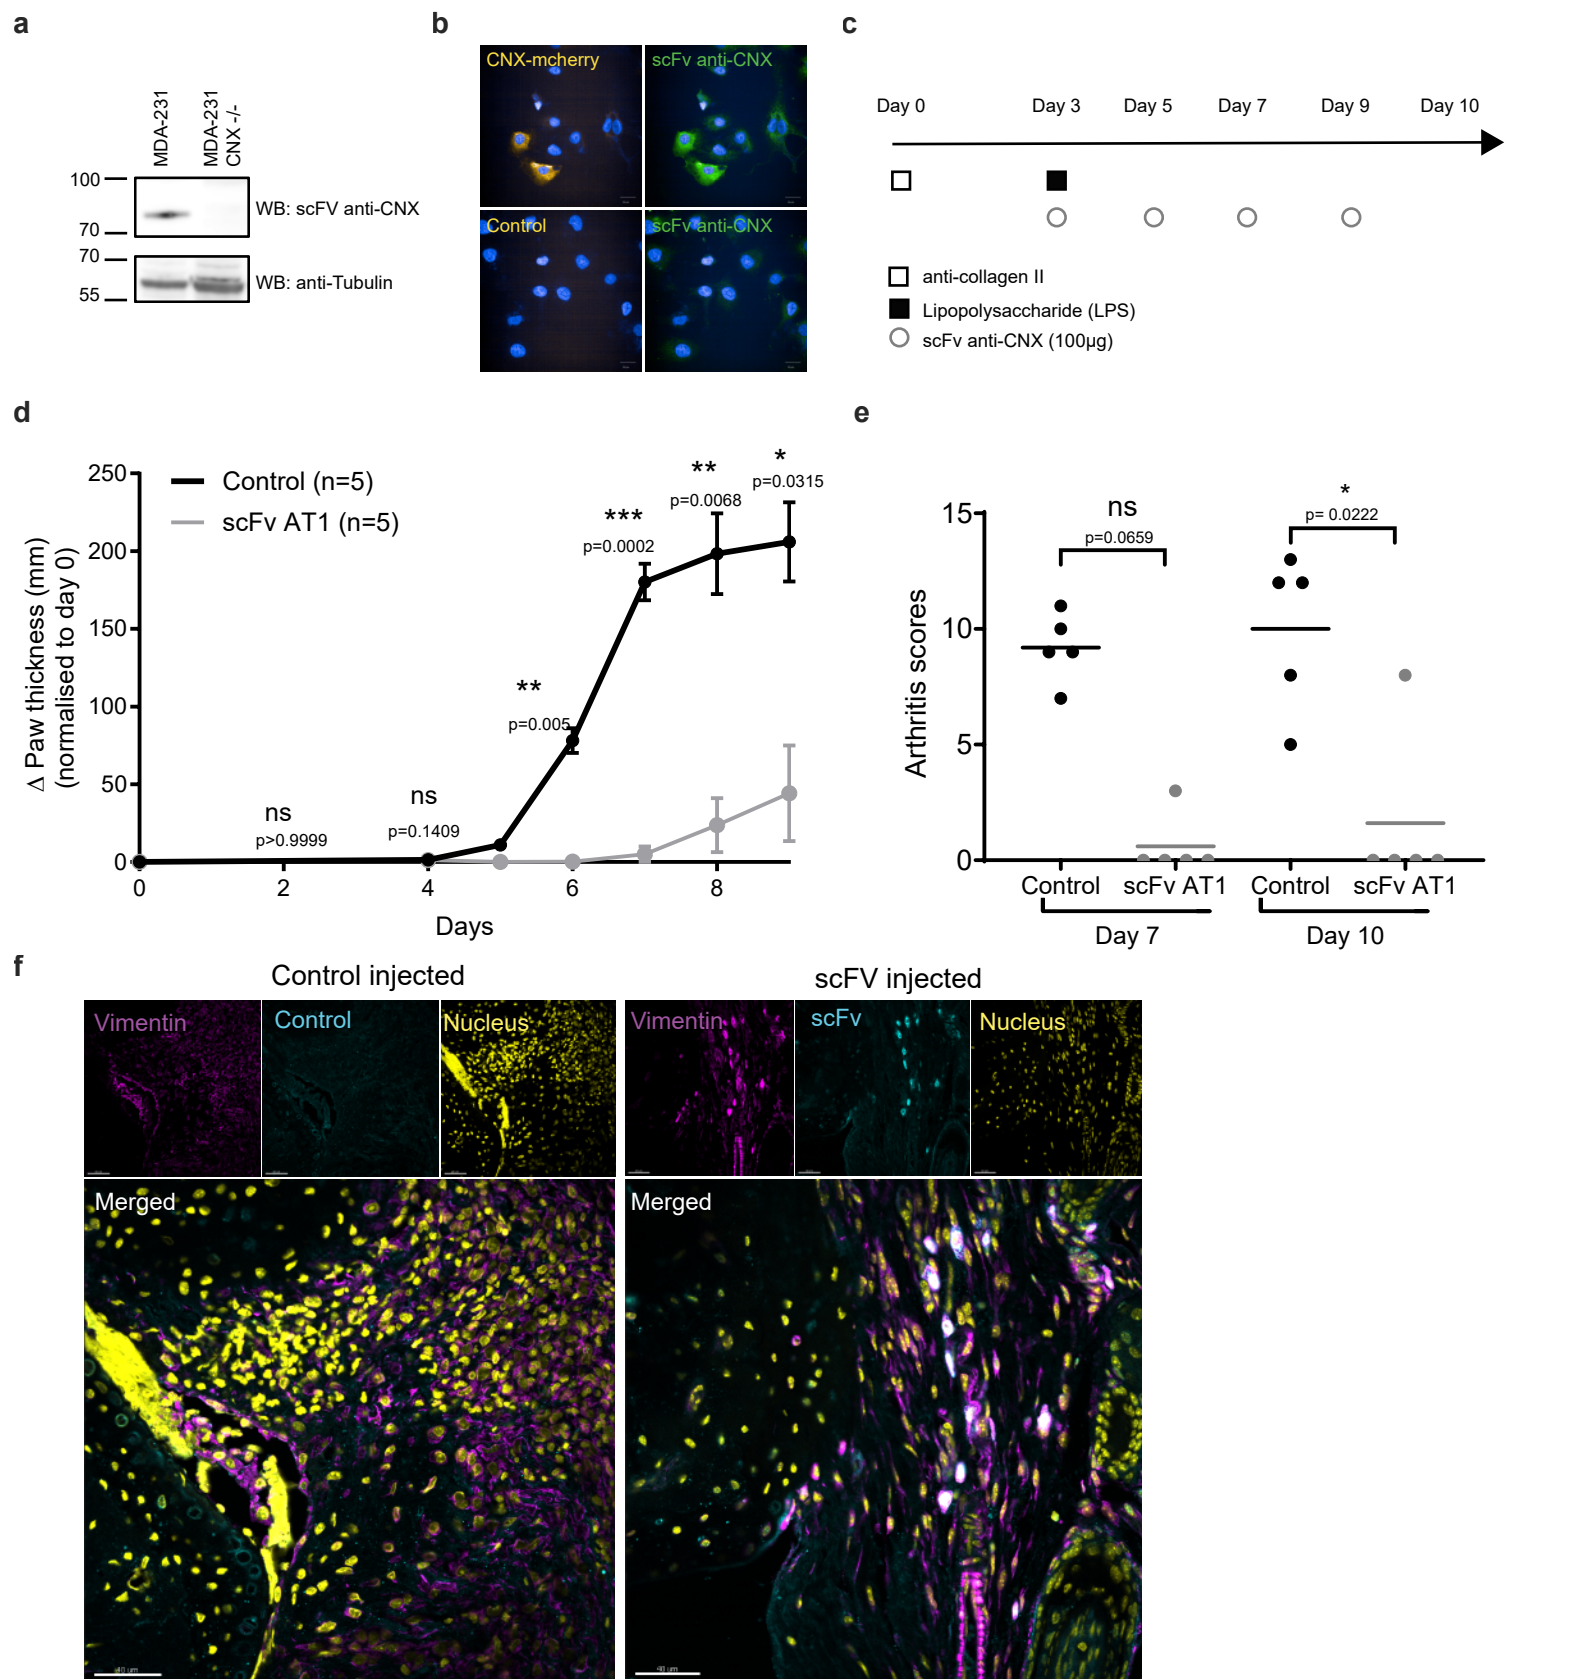

Supplementary Fig. 5: Blockage of CNX with single chain Fv (scFv) protects CAIA mice from arthritis.

(a) Western Blot analysis of CNX with identified scFv against CNX. Cell lysates from MDA-231 and MDA-231 CNX<sup>-/-</sup> probed with myc tagged scFv specific for CNX and subsequently with anti-myc Horseradish peroxidase. A loading control with tubulin is indicated. (b) Representative immunofluorescence images with scFv against CNX. Fixed and permeabilized Huh7 normal cells or Huh7 cells with stably integrated mcherry CNX (orange) subjected to incubation with myc tagged scFv and subsequently to secondary anti-Myc conjugated to PhycoErythrin (green) and Hoechst nuclear dye (blue). Representative pictures for CNX mcherry stable cells are indicated on top (left) along with scFv co-stain (right). Representative pictures for Huh7 control cells are indicated on the bottom (left) along with scFv co-stain (right). All images are from constant acquisition and display settings. Scale bar, 20 μm. (c) Experimental setup of injections and timeline used for treatment of collagen antibody induced arthritis mouse model with scFv against CNX. (d) Paw thickness variation in CAIA mice treated with scFv injection or control PBS injection from day 0 to day 10. Data represent mean ± SEM, n=5 mice injected with isotype antibody or with scFv antibody. \*, p<0.05 (p=0.0315; day 9); \*\*, p<0.01 (p=0.005; day 6 and p=0.0068; day 8); \*\*\*p<0.001 (p=0.0002; day 7); ns, not significant (p>0.9999; day 2 and p=0.1409; day 4) (Two-way ANOVA test). (e) Clinical scores of CAIA mice treated with scFv injection or control PBS injection from day 0 to day 10. \*, p<0.05 (p=0.0222; day 10); ns, not significant (p=0.0659; day 7) (Two-way ANOVA test). (f) Representative immunofluorescence images of synovial tissues sections from CAIA mice day 10 from control PBS or myc tagged scFv injected mice stained with anti-Myc conjugated to PhycoErythrin (green), Vimentin and DAPI. Scale bar, 40 μm.



**Table 1: Antibody list**

| No. | Ab name                           | Supplier name               | CAT number  | Clone                  | Amount used  |
|-----|-----------------------------------|-----------------------------|-------------|------------------------|--------------|
| 1   | Anti-CNX                          | Abcam                       | ab10286     | Rabbit IgG, polyclonal | 1/100        |
| 2   | Anti-CNX                          | Abcam                       | ab22595     | Rabbit IgG, polyclonal | 1/100        |
| 3   | Anti-Vimentin                     | Abcam                       | ab92547     | EPR3776                | 1/200        |
| 4   | Anti-beta actin                   | Abcam                       | ab8226      | mAbcam 8226            | 1/500        |
| 5   | PECy7 conjugated anti-CD45        | Biolegend                   | 103113      | 30-F11                 | 1/200        |
| 6   | PE conjugated anti-Human CD90     | Biolegend                   | 328110      | 5E10                   | 1/100        |
| 7   | Anti-FAP $\alpha$                 | R&D systems                 | MAB3715     | 427819                 | 1/100        |
| 8   | Anti-NEM OX133                    | Absolute Antibody           | Ab00579-1.1 | OX-133                 | 1/100        |
| 9   | Anti-GALNT2                       | Abcam                       | ab262868    | Rabbit IgG, polyclonal | 1/100        |
| 10  | Anti-GALNT2                       | Novus                       | NBP1-83394  | Rabbit IgG, polyclonal | 0.25-2 ug/ml |
| 11  | Anti-TGN46                        | Abcam                       | ab16059     | Rabbit IgG, polyclonal | 1/200        |
| 12  | anti-TGN46                        | AbD Serotec                 | AHP500G     | Sheep IgG, polyclonal  | 1/200        |
| 13  | Anti-Giantin                      | Abcam                       | ab37266     | 9B6                    | 1/200        |
| 14  | Anti-PDIA3 (Anti-ERp57)           | Abcam                       | ab13506     | MaP.Erp57              | 1/200        |
| 15  | Anti-PDIA4 (Anti-ERp72)           | Abcam                       | ab155800    | Rabbit IgG, polyclonal | 1/200        |
| 16  | Anti-PDIA4 (Anti-ERp72)           | Abcam                       | ab82587     | Rabbit IgG, polyclonal | 1/200        |
| 17  | Anti-Collagen I                   | Southern Biotech            | 1310-01     | Goat IgG, polyclonal   | 1/500        |
| 18  | Anti-Collagen III                 | Abcam                       | ab7778      | Rabbit IgG, polyclonal | 1/100        |
| 19  | Anti-Fibronectin                  | Abcam                       | ab2413      | Rabbit IgG, polyclonal | 1/100        |
| 20  | anti-Calreticulin                 | Abcam                       | ab22683     | Mouse IgG, monoclonal  | 1ug/ml       |
| 21  | Rabbit polyclonal isotype control | Abcam                       | ab37415     | Rabbit IgG, polyclonal | 1/100        |
| 22  | Anti-rabbit IgG-HRP               | GE Healthcare Life Sciences | NA934       | Goat IgG               | 1/400        |
| 23  | Anti-mouse IgG-HRP                | GE Healthcare Life Sciences | NA931       | Sheep IgG              | 1/400        |
